# Supplementary material
Source: Springer Nature journal article supplement (https://www.springermedizin.de/resource/supplementary/12874_2005_123_MOESM5_ESM.pdf/9433820)

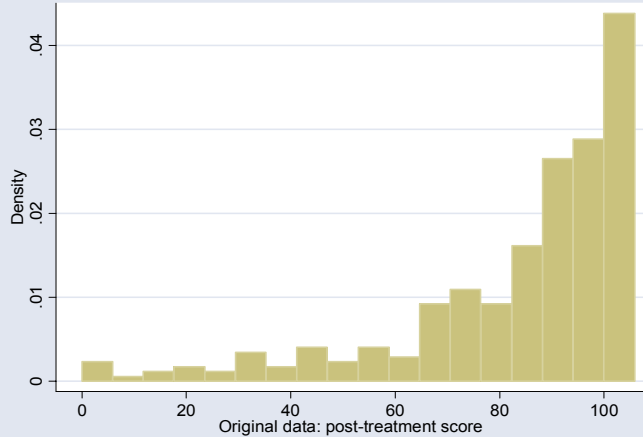

5a

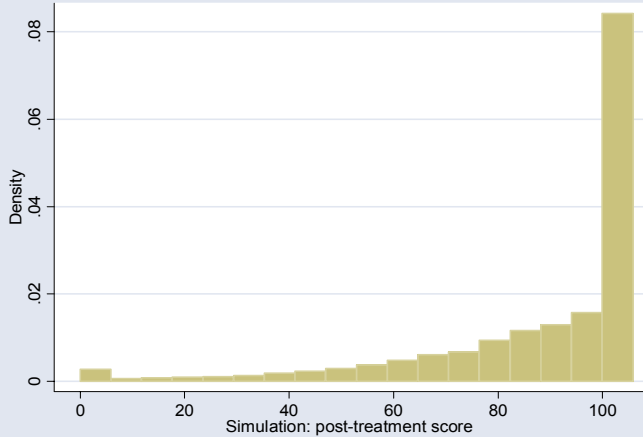

5b

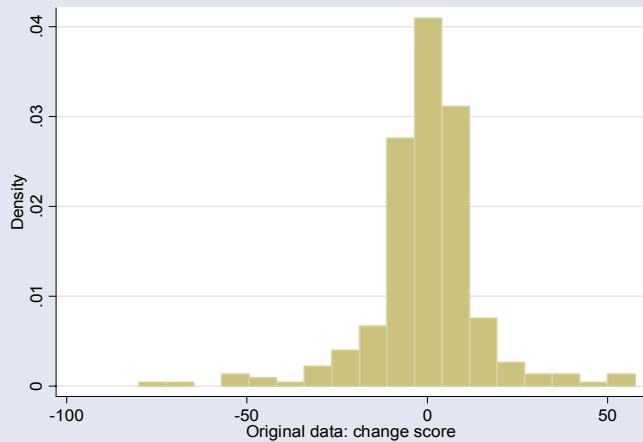

5c

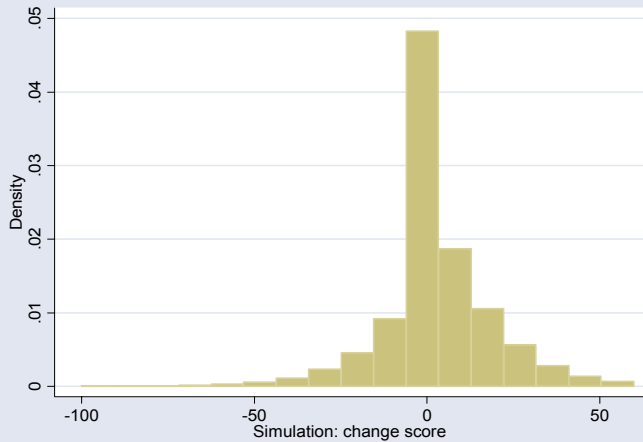

5d

Supplement: MOESM5 [file 9433820]
